# Supplementary material for: Surface engineering to mitigate compressive stress and detrimental reactions in NiOx-based inverted perovskite solar cells
Source: Royal Society of Chemistry journal article supplement (doi:10.1039/d4se01434k), 2025-01-01
Supplement: d4se01434k1.pdf [file d4se01434k1.pdf]

## Supporting Information

# Surface Engineering of Mitigating Compressive Stress and Detrimental Reactions for NiO<sub>x</sub>-based Inverted Perovskite Solar Cells

Zijin Qiao,<sup>#a</sup> Hongye Dong,<sup>#a</sup> Guibin Shen,<sup>b</sup> Xiangning Xu,<sup>a</sup> Wang Yao<sup>a</sup>, Cheng Mu<sup>\*a</sup>

Table S1 Device performance on the concentration of SB12-3 solution

| Concentration<br>(mg / mL) | $V_{OC}$ (V) | $J_{SC}$<br>(mA cm <sup>-2</sup> ) | Fill factor (FF) | PCE (%) |
|----------------------------|--------------|------------------------------------|------------------|---------|
| 0                          | 1.050        | 21.07                              | 0.766            | 16.94   |
| 0.25                       | 1.076        | 22.12                              | 0.764            | 18.18   |
| 0.5                        | 1.084        | 22.32                              | 0.782            | 18.92   |
| 1                          | 1.087        | 21.54                              | 0.747            | 17.51   |

Table S2 Device performance without SB12-3 modification.

| Concentration<br>(mg / mL) | $V_{OC}$ (V) | $J_{SC}$<br>(mA cm <sup>-2</sup> ) | Fill factor (FF) | PCE (%) |
|----------------------------|--------------|------------------------------------|------------------|---------|
| 1                          | 1.064        | 21.14                              | 0.708            | 15.92   |
| 2                          | 1.064        | 20.41                              | 0.704            | 15.29   |
| 3                          | 1.065        | 21.25                              | 0.730            | 16.53   |
| 4                          | 1.044        | 21.42                              | 0.710            | 15.88   |
| 5                          | 1.051        | 20.44                              | 0.708            | 15.20   |
| 6                          | 1.052        | 20.79                              | 0.745            | 16.30   |
| 7                          | 1.049        | 20.62                              | 0.763            | 16.49   |
| 8                          | 1.042        | 21.31                              | 0.723            | 16.04   |
| 9                          | 1.040        | 21.12                              | 0.760            | 16.69   |
| 10                         | 1.045        | 21.37                              | 0.741            | 16.54   |
| 11                         | 1.062        | 20.28                              | 0.723            | 15.48   |
| 12                         | 1.052        | 20.79                              | 0.760            | 16.30   |
| 13                         | 1.049        | 20.61                              | 0.741            | 16.49   |
| 14                         | 1.043        | 21.33                              | 0.719            | 16.79   |
| 15                         | 1.040        | 21.31                              | 0.745            | 16.15   |
| 16                         | 1.060        | 20.58                              | 0.701            | 15.38   |
| 17                         | 1.066        | 20.45                              | 0.737            | 16.06   |
| 18                         | 1.036        | 21.01                              | 0.702            | 15.27   |
| 19                         | 1.052        | 20.22                              | 0.712            | 15.15   |
| 20                         | 1.063        | 21.32                              | 0.747            | 16.70   |
| 21                         | 1.060        | 20.29                              | 0.748            | 16.08   |
| 22                         | 1.060        | 21.75                              | 0.724            | 16.68   |
| 23                         | 1.069        | 20.90                              | 0.730            | 16.31   |
| 24                         | 1.067        | 20.23                              | 0.743            | 16.05   |
| 25                         | 1.064        | 20.02                              | 0.739            | 15.73   |
| 26                         | 1.064        | 21.16                              | 0.732            | 16.48   |
| 27                         | 1.074        | 20.32                              | 0.715            | 15.60   |
| 28                         | 1.066        | 19.71                              | 0.722            | 15.16   |
| 29                         | 1.054        | 20.07                              | 0.732            | 15.48   |
| 30                         | 1.046        | 20.67                              | 0.734            | 15.87   |

Table S3 Device performance with SB12-3 modification

| Concentration<br>(mg / mL) | $V_{OC}$ (V) | $J_{SC}$<br>(mA cm <sup>-2</sup> ) | Fill factor (FF) | PCE (%) |
|----------------------------|--------------|------------------------------------|------------------|---------|
| 1                          | 1.073        | 21.37                              | 0.745            | 17.09   |
| 2                          | 1.081        | 21.47                              | 0.742            | 17.21   |
| 3                          | 1.083        | 21.41                              | 0.731            | 16.95   |
| 4                          | 1.072        | 21.18                              | 0.746            | 16.93   |
| 5                          | 1.060        | 21.67                              | 0.756            | 17.36   |
| 6                          | 1.083        | 22.32                              | 0.782            | 18.92   |
| 7                          | 1.073        | 21.90                              | 0.771            | 18.12   |
| 8                          | 1.083        | 22.05                              | 0.780            | 18.61   |
| 9                          | 1.082        | 21.85                              | 0.734            | 17.36   |
| 10                         | 1.089        | 21.83                              | 0.743            | 17.66   |
| 11                         | 1.083        | 21.66                              | 0.730            | 17.13   |
| 12                         | 1.077        | 21.77                              | 0.739            | 17.30   |
| 13                         | 1.084        | 21.70                              | 0.738            | 17.37   |
| 14                         | 1.068        | 21.26                              | 0.753            | 17.10   |
| 15                         | 1.083        | 21.19                              | 0.764            | 17.54   |
| 16                         | 1.090        | 21.80                              | 0.721            | 17.13   |
| 17                         | 1.087        | 21.76                              | 0.727            | 17.19   |
| 18                         | 1.086        | 22.66                              | 0.743            | 18.28   |
| 19                         | 1.087        | 22.72                              | 0.736            | 18.17   |
| 20                         | 1.078        | 21.76                              | 0.712            | 16.69   |
| 21                         | 1.088        | 21.68                              | 0.729            | 17.21   |
| 22                         | 1.083        | 22.16                              | 0.716            | 17.18   |
| 23                         | 1.082        | 22.30                              | 0.725            | 17.49   |
| 24                         | 1.084        | 22.09                              | 0.714            | 17.09   |
| 25                         | 1.084        | 22.14                              | 0.719            | 17.25   |
| 26                         | 1.079        | 21.03                              | 0.781            | 17.71   |
| 27                         | 1.085        | 22.47                              | 0.712            | 17.32   |
| 28                         | 1.083        | 21.99                              | 0.733            | 17.47   |
| 29                         | 1.076        | 21.42                              | 0.772            | 17.78   |
| 30                         | 1.073        | 21.54                              | 0.755            | 17.46   |

Table S4. Time constants of the fast ( $\tau_1$ ) and slow ( $\tau_2$ ) decay components obtained from the TRPL spectra of the perovskite films.

| Sample                    | $\tau_1$ (ns) | $A_1$ | $\tau_2$ (ns) | $A_2$ | $\tau_{\text{avg}}$ (ns) |
|---------------------------|---------------|-------|---------------|-------|--------------------------|
| NiO <sub>x</sub>          | 138.9         | 0.44  | 1391          | 0.32  | 1253.60                  |
| NiO <sub>x</sub> / SB12-3 | 19.74         | 25.44 | 1175.78       | 0.34  | 854.08                   |

The average lifetime can be calculated with the equation of:  $\tau_{\text{avg}} = (A_1\tau_1^2 + A_2\tau_2^2) / (A_1\tau_1 + A_2\tau_2)$ . Here,  $\tau_1$  and  $\tau_2$  represent trap-assisted and free carrier recombination, respectively,  $A_1$  and  $A_2$  represent the decay amplitude.

Table S5.  $V_{\text{TFL}}$  and  $N_t$  from the space charge limited current measurements of the hole-only devices.

| Devices                   | $\epsilon_0$<br>( $\times 10^{-12}$ F m <sup>-1</sup> ) | $\epsilon$ | $V_{\text{TFL}}$<br>(V) | $e$<br>( $\times 10^{-19}$ C) | $L$ (nm) | $N_t$<br>( $\times 10^{15}$ cm <sup>-3</sup> ) |
|---------------------------|---------------------------------------------------------|------------|-------------------------|-------------------------------|----------|------------------------------------------------|
| NiO <sub>x</sub>          | 8.85                                                    | 26         | 0.25                    | 1.6                           | 715      | 1.40                                           |
| NiO <sub>x</sub> / SB12-3 | 8.85                                                    | 26         | 0.16                    | 1.6                           | 715      | 0.39                                           |

The trap density  $N_t$  is defined as:

$$N_t = 2\epsilon\epsilon_0 V_{\text{TFL}} / eL^2$$

Here,  $\epsilon_0$  is the vacuum permittivity,  $\epsilon$  is the relative dielectric constant,  $e$  is the elementary charge, and  $L$  is the thickness of perovskite film.

Table S6. Fitting parameters of TPV curve with different devices.

| Sample                    | $\tau_1$ ( $\mu$ s) | $A_1$ | $\tau_2$ ( $\mu$ s) | $A_2$ | $\tau_{\text{avg}}$ ( $\mu$ s) |
|---------------------------|---------------------|-------|---------------------|-------|--------------------------------|
| NiO <sub>x</sub>          | 4.74                | 0.30  | 12.71               | 0.17  | 8.19                           |
| NiO <sub>x</sub> / SB12-3 | 7.55                | 0.94  | 36.04               | 0.04  | 12.36                          |

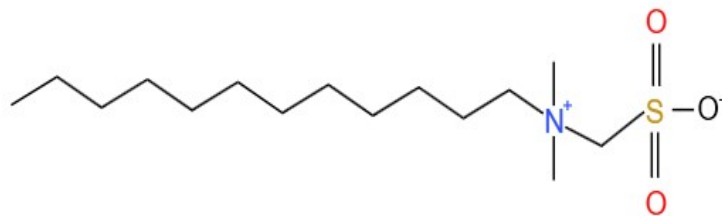

Figure S1 Molecule structure of SB12-3.

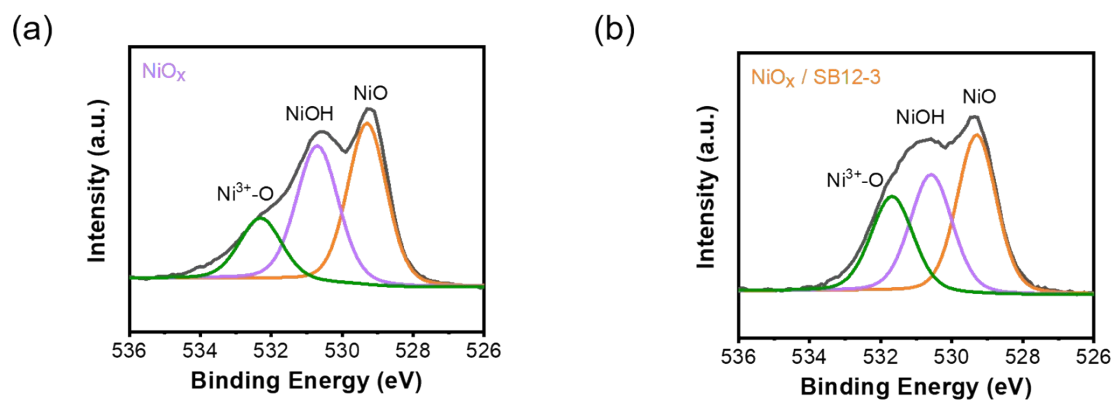

Figure S2. XPS spectra of O 1s for (a) NiO<sub>x</sub> and (b) NiO<sub>x</sub>/SB12-3.

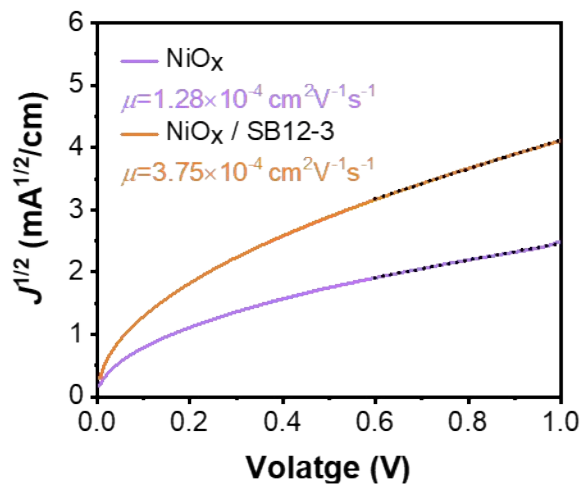

Figure S3: Electron mobility curves of NiO<sub>x</sub> and NiO<sub>x</sub>/SB12-3.

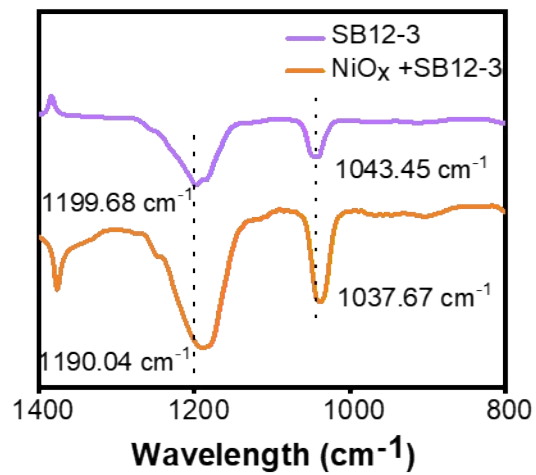

Figure S4: Fourier transform infrared (FTIR) spectra of NiO<sub>x</sub> with or w/o SB12-3.

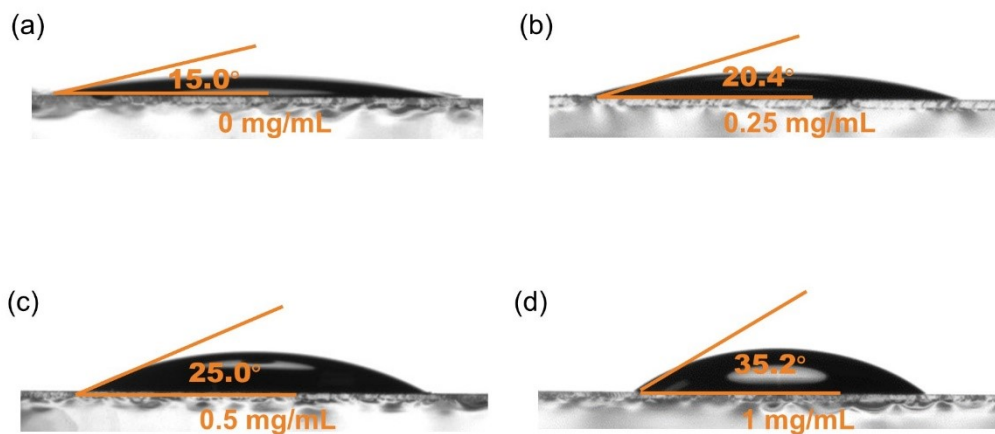

Figure S5: The contact angles of perovskite solution deposited on NiO<sub>x</sub> layer with different concentration of SB12-3 solution.

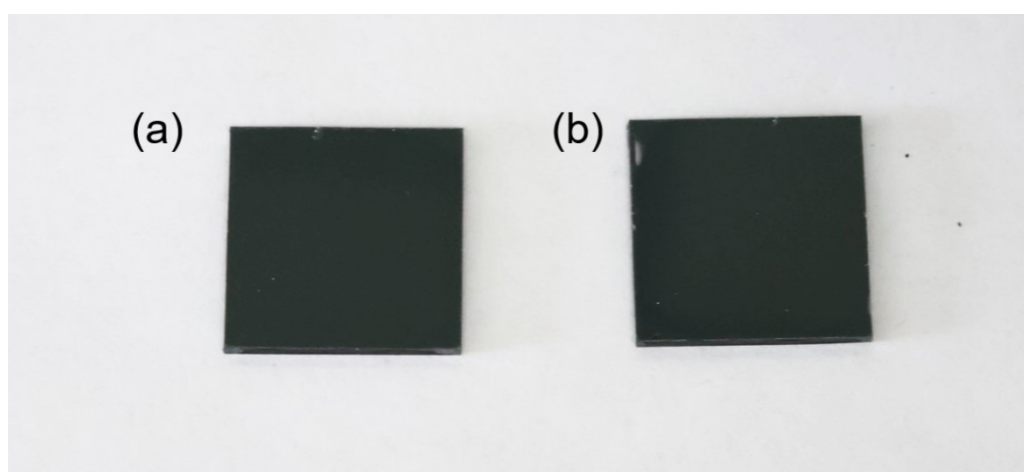

Figure S6: Fabricated film photographs of the (a) NiO<sub>x</sub>/perovskite and (b) NiO<sub>x</sub> /0.5mg/mL SB12-3/ perovskite.

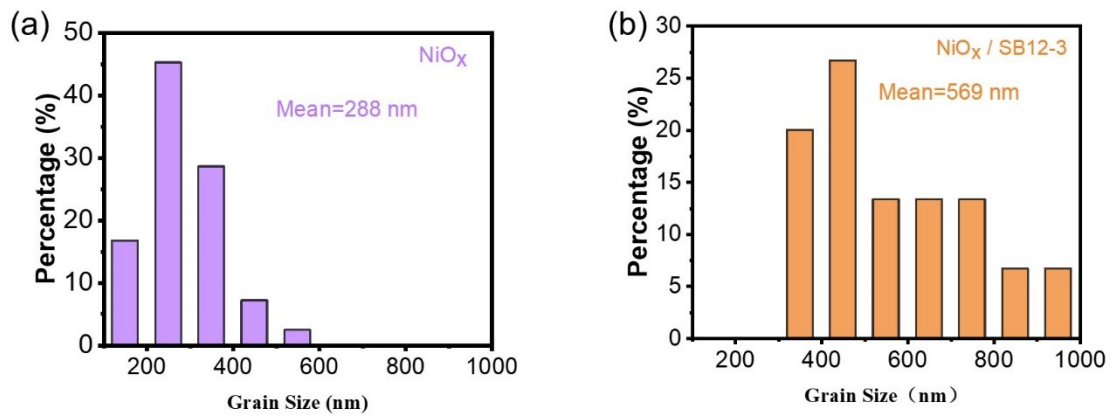

Figure S7 : Histogram of grain size distribution corresponding to the top-view SEM of perovskite films deposited on (a)  $\text{NiO}_x$  and (b)  $\text{NiO}_x / \text{SB12-3}$ .

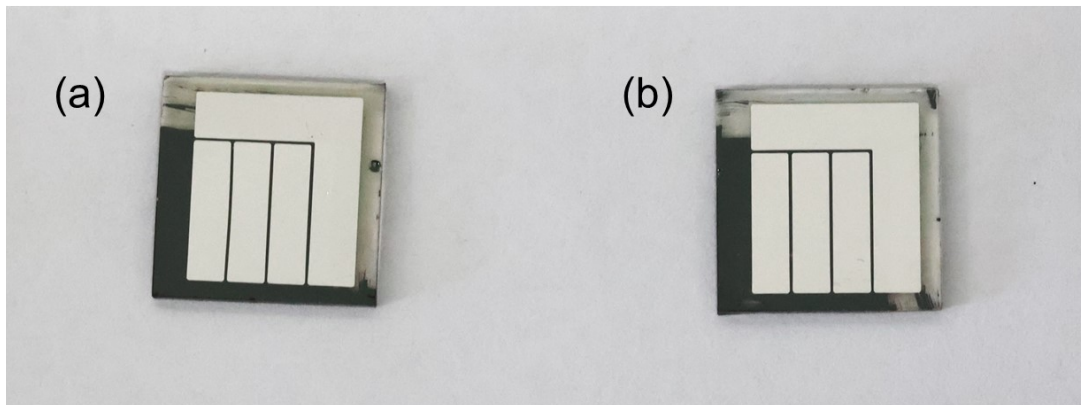

Figure S8: Device photographs of the (a)  $\text{NiO}_x$  and (b)  $\text{NiO}_x / \text{SB12-3}$  PSCs.



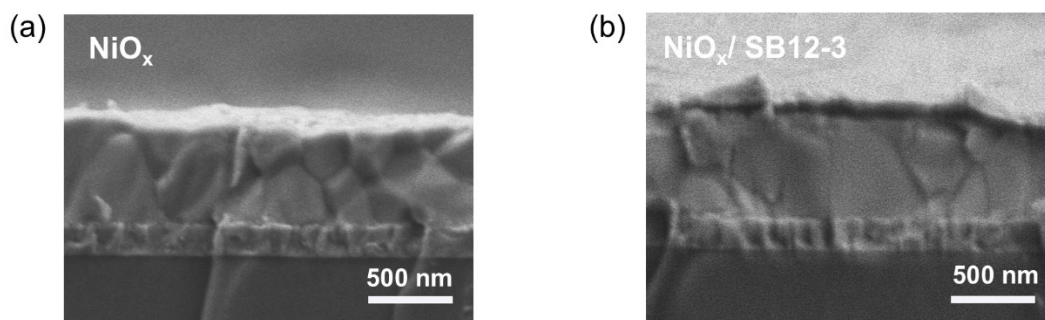

Figure S9: Cross-sectional SEM images of the (a)  $\text{NiO}_x$  and (b)  $\text{NiO}_x / \text{SB12-3}$  PSCs.

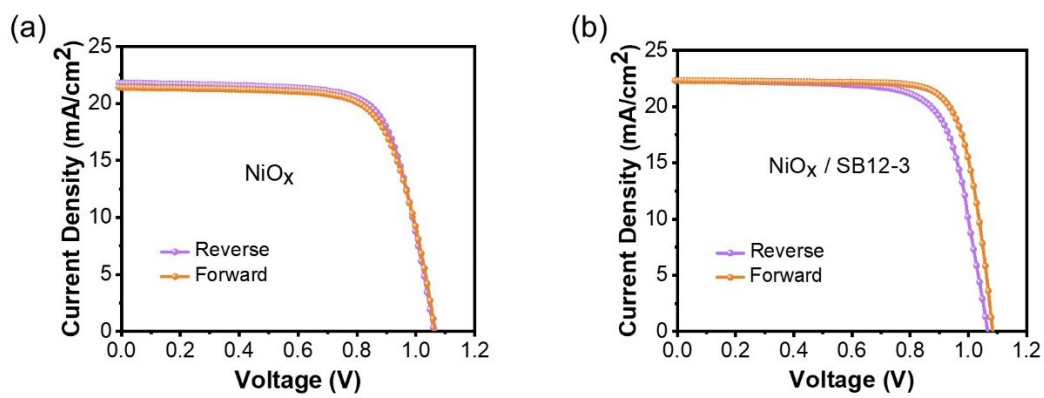

Figure S10: J-V curves of the control and modified PSCs measured in forward and reverse scans.

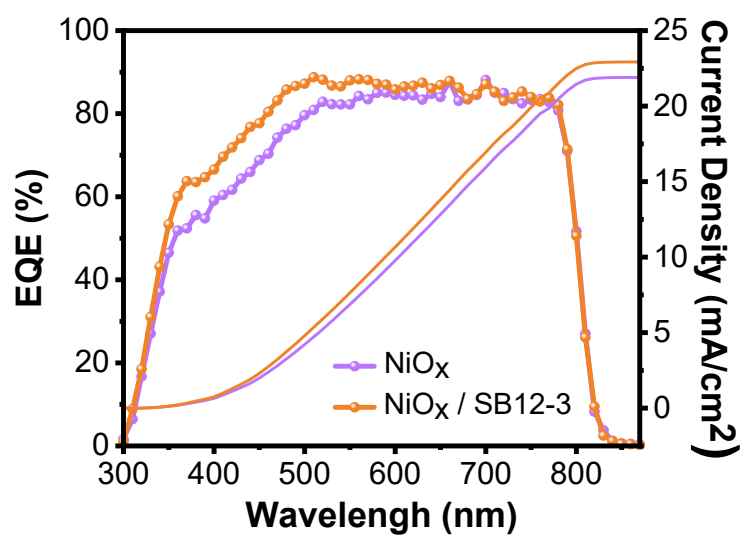

Figure S11: EQE spectra and the corresponding integrated  $J_{SC}$ .

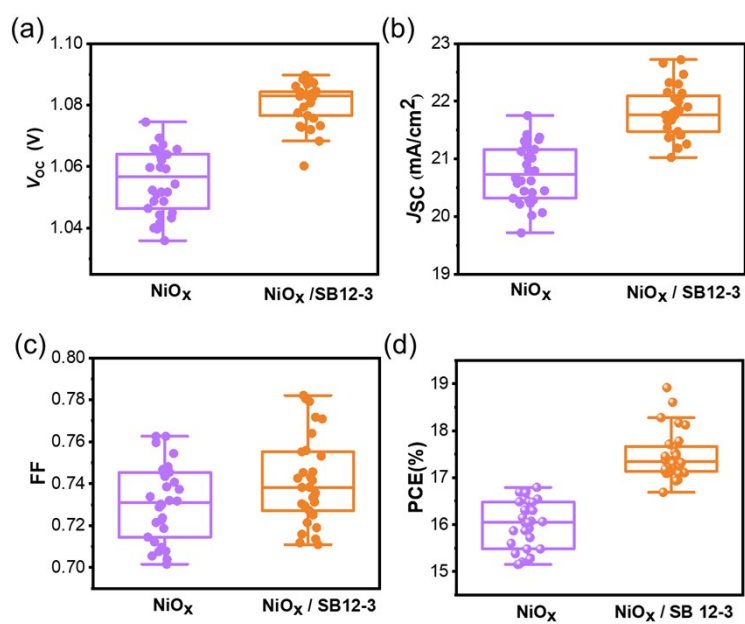

Figure S12: Statistical distribution of  $V_{OC}$  (a);  $J_{SC}$  (b); FF (c) and PCE(d) for 30 devices.

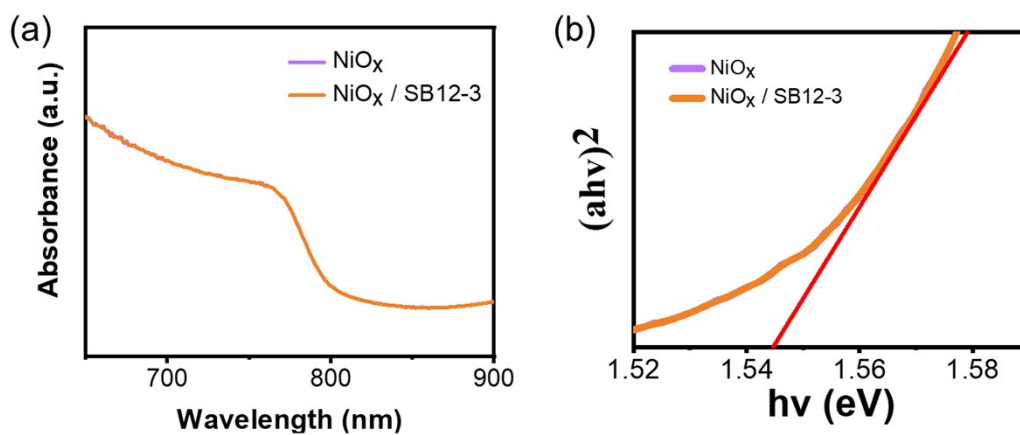

Figure S13: (a) UV-Vis absorption spectra of perovskite films deposited on  $\text{NiO}_x$  and  $\text{NiO}_x / \text{SB12-3}$ , (b) Tauc plot of perovskite films at  $\text{NiO}_x$  and  $\text{NiO}_x / \text{SB12-3}$  layer.
